# Supplementary material for: The right ventricle in tetralogy of Fallot: adaptation to sequential loading
Source: PubMed Central journal article supplement (PMC10061113; doi:10.3389/fped.2023.1098248), 2023-03-16
Supplement: Datasheet1.pdf [file Datasheet1.pdf]

## Supplementary Material

### 1 Supplementary Figures and Tables

#### 1.1 Supplementary Figures

**Supplementary Figure 1.** Clusters of differentially expressed genes in right ventricular myocardium from studies comparing Tetralogy of Fallot patients to controls (21, 48-50).

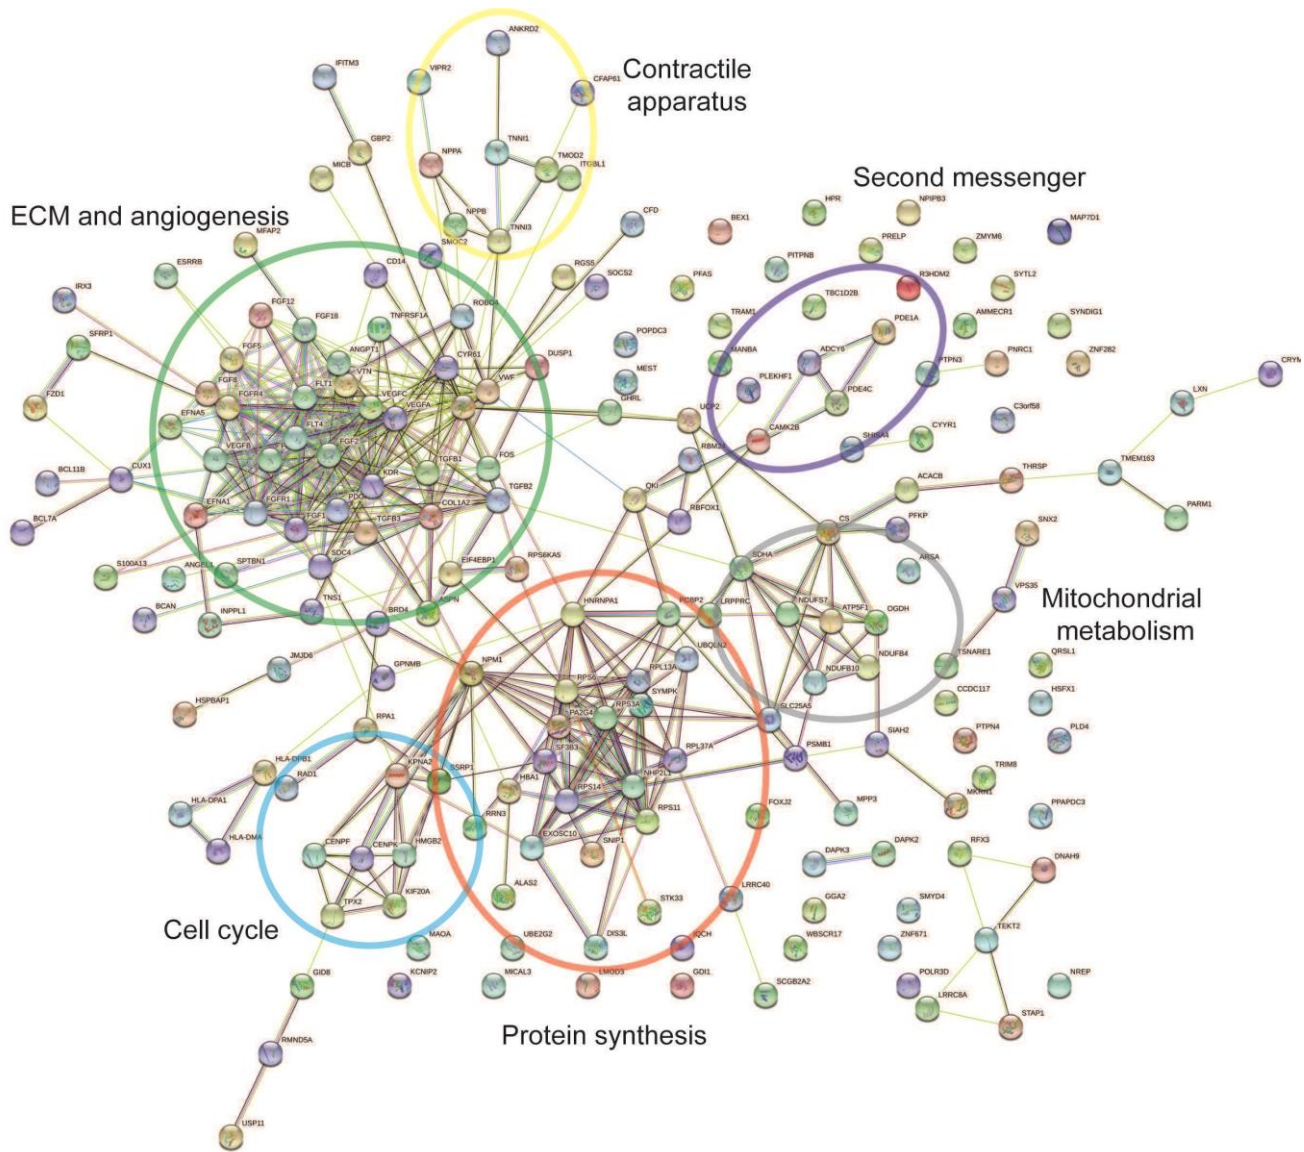

## 1.2 Supplementary Tables

**Supplementary Table 2.** Lists of differentially expressed genes in right ventricular myocardium from studies comparing Tetralogy of Fallot patients to controls (21, 48-50).

| Zhao et al.<br>(2019)(49) | Peters et al.<br>(2013)(21) | Zhang et al.<br>(2012)(48) | Kaynak et al.<br>(2003)(50) |
|---------------------------|-----------------------------|----------------------------|-----------------------------|
| 3-Mar                     | VEGFA                       | ALAS2                      | A2BP1                       |
| BEX1                      | VEGFB                       | ANKRD2                     | ACACB                       |
| BRD4                      | VEGFC                       | ASPN                       | ADCY6                       |
| CCDC117                   | VEGFD                       | C20orf26                   | AMMECR1                     |
| DAPK3                     | FLT1                        | C5orf13                    | ARSA                        |
| EFNA5                     | KDR                         | CD14                       | ATP5F1                      |
| ESRRB                     | FLT4                        | CENPF                      | BCL11B                      |
| FGF18                     | ANGPT1                      | COL1A2                     | BCL7A                       |
| FOXJ2                     | TNF                         | CRYM                       | BRDG1                       |
| FZD1                      | TNFR1                       | CYR61                      | CAMK2B                      |
| GGA2                      | TGFB1                       | DAPK2                      | CS                          |
| GID8                      | TGFB2                       | DF                         | CYYR1                       |
| GPNMB                     | TGFB2R                      | DUSP1                      | D1346                       |
| GPNMB                     | TGFB3                       | EIF4EBP1                   | DIA1                        |
| HMGB2                     | TGFB3R                      | FOS                        | DKFZP566                    |
| HNRNPA1                   | PDGFA                       | GBP2                       | DNAH9                       |
| IRX3                      | EFNA1                       | GHRL_HUMAN                 | FKSG14                      |
| ITGBL1                    | FGF1                        | HBA1                       | FLJ10350                    |
| MANBA                     | FGF2                        | HLA-DMA                    | FLJ10989                    |
| MKRN1                     | FGF5                        | HLA-DPA1                   | FLJ20312                    |
| NPM1                      | FGF8                        | HLA-DPB1                   | FLJ20331                    |
| PARM1                     | FGF8                        | HPR                        | FLJ22623                    |
| PFKP                      | FGF12                       | KCNIP2                     | GDI1                        |
| PITPNB                    | FGF18                       | KIF20A                     | IFITM3                      |
| PLD4                      | FGFR1                       | KPNA2                      | INPPL1                      |
| PNRC1                     | FGFR4                       | LMOD3                      | KIAA0220                    |
| POLR3D                    |                             | MAOA                       | KIAA0759                    |

|         |            |          |
|---------|------------|----------|
| POPDC3  | MEST       | KIAA1055 |
| R3HDM2  | MFAP2      | KIAA1353 |
| RMND5A  | MPP3       | KIAA1437 |
| RPA1    | NP_073621  | LOC51177 |
| SDC4    | NP_112185  | LOC51189 |
| SF3B3   | NP_659440  | LOC51244 |
| SFRP1   | NPPA       | LRPPRC   |
| SHISA4  | NPPB       | LW-1     |
| SIAH2   | O94909     | LXN      |
| SLC25A5 | PIPI_HUMAN | MGC10600 |
| SMYD4   | PLEKHF1    | MGC12921 |
| SOCS2   | PRELP      | MGC13038 |
| SSRP1   | PTDSR      | MGC2664  |
| SYMPK   | PTPN3      | MGC4562  |
| SYNDIG1 | Q8TCB4     | MICB     |
| TNNI1   | Q9NT46     | MSTP032  |
| UCP2    | RBM24      | NDUFB10  |
| USP11   | SMOC2      | NDUFB4   |
| VIPR2   | SPTBN1     | NDUFS7   |
| WBSCR17 | TNS        | NHP2L1   |
| ZNF282  | TPX2       | OGDH     |
| ZNF671  | VTN        | PA2G4    |
|         |            | PCBP2    |
|         |            | PDE1A    |
|         |            | PDE4C    |
|         |            | PFAS     |
|         |            | PMSCL2   |
|         |            | PSMB1    |
|         |            | PTPN4    |
|         |            | QKI      |
|         |            | RAD1     |
|         |            | RFX3     |
|         |            | RNF27    |

|         |
|---------|
| ROBO4   |
| RPL13A  |
| RPL37A  |
| RPS11   |
| RPS14   |
| RPS3A   |
| RPS6    |
| RPS6KA5 |
| RRN3    |
| S100A13 |
| SCGB2A2 |
| SDHA    |
| SNIP1   |
| SNX2    |
| STK33   |
| SYTL2   |
| TEKT2   |
| THRSP   |
| TMOD2   |
| TNNI1   |
| TNNI3   |
| TRAM    |
| UBE2G2  |
| UBQLN2  |
| VPS35   |
| VWF     |
